# Supplementary material for: Photovoltaic performance and power conversion efficiency prediction of double fence porphyrins
Source: Royal Society of Chemistry journal article supplement (doi:10.1039/d1cp03593b), 2021-01-01
Supplement: d1cp03593b1.pdf [file d1cp03593b1.pdf]

## Table lists

**Table.S1** Dihedral angles ( $^{\circ}$ ) and bond lengths ( $\text{\AA}$ ) of experimental dyes in the solvent of THF.

**Table.S2** Vertical excitation energy (eV), absorption peak (nm), main electron transitions and oscillator strengths ( $f$ ) of investigated dye@TiO<sub>2</sub> composites in the solvent of tetrahydrofuran.

**Table.S3** Vertical excitation energy (eV), absorption peak (nm), electron transitions, oscillator strengths ( $f$ ), and light harvesting efficiency ( $LHE$ ) of investigated dyes.

**Table.S4** Dihedral angles ( $^{\circ}$ ) and bond lengths ( $\text{\AA}$ ) of design dyes in the solvent of THF.

**Table.S5** The contribution for holes and electrons by different parts ( $D$ ,  $\pi$ ,  $A$ ) of investigated single molecules.

**Table S6.** The calculated electronic transition data in terms of excitation energies ( $E$ ), band wavelengths ( $\lambda$ ), oscillator strengths ( $f$ ), the main transition mode and probability of electron in THF on CPCM model.

**Table S7.** The simulated Ti-O distances ( $\text{\AA}$ ) between TiO<sub>2</sub> and dye of investigated dye/TiO<sub>2</sub> composites as well as interaction energy (kcal/mol).

**TableS1.** Dihedral angles (°) and bond lengths (Å) of experimental dyes in the solvent of THF.

|                        |         | Mjs2           |       | Bjs2            |       |
|------------------------|---------|----------------|-------|-----------------|-------|
| Dihedral<br>angles (°) | D1-Pi   | C8-C1-N45-C46  | -34.4 | C10-C1-N45-C46  | 80.2  |
|                        | D2-Pi   | C8-C1-C30-C32  | 35.7  | C10-C1-C30-C36  | -31.9 |
|                        | M/B-Pi  | C23-C4-C80-C86 | 90.3  | C13-C12-C82-C98 | 65.9  |
|                        | A(G)-Pi | C20-C3-C31-C65 | 0.4   | C18-C3-C31-C66  | 0.1   |
|                        | A(H)-Pi | C20-C3-C71-C76 | 32.1  | C18-C3-C71-C76  | -31.1 |
| Bond length<br>(Å)     | d1      | N45-C34        | 1.430 | N45-C34         | 1.429 |
|                        | d2      | C30-C1         | 4.063 | C30-C1          | 4.061 |
|                        | d3      | C3-C31         | 4.051 | C3-C31          | 4.050 |
|                        | d4      | C64-C71        | 1.478 | C64-C71         | 1.478 |

**Table S2.** Vertical excitation energy (eV), absorption peak (nm), main electron transitions and oscillator strengths ( $f$ ) of investigated dye@TiO<sub>2</sub> composites.

| Dye                     | State | E(eV)  | $\lambda_{\max}$ (nm) | $f$    | CI(main)       |
|-------------------------|-------|--------|-----------------------|--------|----------------|
| Mjs2@TiO <sub>2</sub>   | 1     | 1.8769 | 660.58                | 1.3653 | H→L+1(0.59)    |
|                         | 2     | 2.1156 | 586.05                | 0.0074 | H-2→L+1(0.49)  |
|                         | 3     | 2.5478 | 486.63                | 0.4813 | H-1→L+1(0.37)  |
|                         | 4     | 2.8792 | 430.62                | 2.3694 | H-2→L+9(0.48)  |
|                         | 5     | 2.9939 | 414.12                | 1.2407 | H-2→L+1(0.44)  |
|                         | 6     | 3.0630 | 404.78                | 0.0069 | H-3→L+1(0.42)  |
|                         | 7     | 3.1221 | 397.12                | 0.0757 | H-1→L+1(0.38)  |
|                         | 8     | 3.2231 | 384.67                | 0.0021 | H→L(0.66)      |
| Bjs2@TiO <sub>2</sub>   | 1     | 1.8991 | 652.87                | 1.3421 | H→L+1(0.59)    |
|                         | 2     | 2.0905 | 593.09                | 0.0740 | H-2→L+1(0.50)  |
|                         | 3     | 2.5541 | 485.43                | 0.6071 | H-1→L+1(0.34)  |
|                         | 4     | 2.8338 | 437.52                | 2.3279 | H-2→L+9(0.47)  |
|                         | 5     | 2.9942 | 414.09                | 1.3160 | H→L+9(0.53)    |
|                         | 6     | 3.0626 | 404.83                | 0.0154 | H-3→L+1(0.39)  |
|                         | 7     | 3.1445 | 394.29                | 0.0653 | H-1→L+1(0.34)  |
|                         | 8     | 3.2120 | 386.00                | 0.0007 | H→L(0.66)      |
| B-Dye1@TiO <sub>2</sub> | 1     | 1.8943 | 654.51                | 1.3591 | H→L+1(0.58)    |
|                         | 2     | 2.0886 | 593.62                | 0.0752 | H-2→L+1(0.51)  |
|                         | 3     | 2.5505 | 486.12                | 0.5922 | H-1→L+1(0.35)  |
|                         | 4     | 2.8243 | 438.99                | 2.2610 | H-2→L+10(0.45) |
|                         | 5     | 2.9912 | 414.50                | 1.3801 | H→L+10(0.50)   |
|                         | 6     | 3.0566 | 405.63                | 0.0084 | H-3→L+1(0.37)  |
|                         | 7     | 3.1379 | 395.11                | 0.0854 | H-1→L+1(0.35)  |
|                         | 8     | 3.2072 | 386.58                | 0.0011 | H→L(0.65)      |
| B-Dye2@TiO <sub>2</sub> | 1     | 1.8994 | 652.75                | 1.3418 | H→L+1(0.56)    |
|                         | 2     | 2.0836 | 595.05                | 0.0891 | H-1→L+1(0.52)  |
|                         | 3     | 2.5438 | 487.39                | 0.5982 | H-2→L+1(0.35)  |
|                         | 4     | 2.8382 | 436.84                | 2.2236 | H-1→L+9(0.47)  |
|                         | 5     | 2.9986 | 413.47                | 1.2952 | H→L+9(0.51)    |
|                         | 6     | 3.0609 | 405.06                | 0.0074 | H-3→L+1(0.38)  |
|                         | 7     | 3.1376 | 395.15                | 0.1006 | H-2→L+1(0.35)  |
|                         | 8     | 3.2398 | 382.70                | 0.0009 | H→L(0.64)      |

**Table S3.** Vertical excitation energy (eV), absorption peak (nm), electron transitions, oscillator strengths ( $f$ ), and light harvesting efficiency ( $LHE$ ) of investigated dyes@TiO<sub>2</sub>.

| Dye                     | Energy | $\lambda$ | $f$    | $LHE$  |
|-------------------------|--------|-----------|--------|--------|
| Mjs2@TiO <sub>2</sub>   | 1.8769 | 660.58    | 1.3653 | 0.9568 |
| Bjs2@TiO <sub>2</sub>   | 1.8991 | 652.87    | 1.3421 | 0.9546 |
| B-Dye1@TiO <sub>2</sub> | 1.8943 | 654.51    | 1.3591 | 0.9563 |
| B-Dye2@TiO <sub>2</sub> | 1.8994 | 652.75    | 1.3418 | 0.9545 |

**TableS4.** Dihedral angles (°) and bond lengths (Å) of design dyes in the solvent of THF.

|                     |         | B-Dye1          |       | B-Dye2          |       |
|---------------------|---------|-----------------|-------|-----------------|-------|
| Dihedral angles (°) | D1-Pi   | C10-C1-N45-C46  | 80.6  | C10-C1-N45-C46  | 80.7  |
|                     | D2-Pi   | C10-C1-C30-C36  | -30.8 | C10-C1-C30-C36  | -30.8 |
|                     | M/B-Pi  | C13-C12-C82-C98 | 66.1  | C13-C12-C82-C98 | 66.0  |
|                     | A(G)-Pi | C18-C3-C31-C66  | -0.7  | C18-C3-C31-C66  | -0.1  |
|                     | A(H)-Pi | C18-C3-C71-C76  | -32.6 | C18-C3-C71-C76  | -36.2 |
| Bond length (Å)     | d1      | N45-C34         | 1.429 | N45-C34         | 1.429 |
|                     | d2      | C30-C1          | 4.061 | C30-C1          | 4.061 |
|                     | d3      | C3-C31          | 4.043 | C3-C31          | 4.042 |
|                     | d4      | C64-C71         | 1.477 | C64-C71         | 1.478 |

**Table S5.** The contribution for holes and electrons by different parts (*D*,  $\pi$ , *A*) of investigated single molecules.

| Dye    |               | hole   | electron |
|--------|---------------|--------|----------|
| Mjs2   | Donor         | 10.75% | 8.06%    |
|        | $\pi$ -bridge | 83.44% | 85.27%   |
|        | Acceptor      | 5.81%  | 6.67%    |
| Bjs2   | Donor         | 11.80% | 8.92%    |
|        | $\pi$ -bridge | 82.42% | 84.26%   |
|        | Acceptor      | 5.78%  | 6.82%    |
| B-Dye1 | Donor         | 12.83% | 7.98%    |
|        | $\pi$ -bridge | 80.11% | 80.37%   |
|        | Acceptor      | 7.06%  | 11.64%   |
| B-Dye2 | Donor         | 15.52% | 7.72%    |
|        | $\pi$ -bridge | 78.75% | 80.58%   |
|        | Acceptor      | 5.73%  | 11.70%   |

**Table S6.** The calculated electronic transition data in terms of excitation energies (E), band wavelengths ( $\lambda$ ), oscillator strengths ( $f$ ), the main transition mode and probability of electron in THF on CPCM model.

| Dye           | State | E (eV) | $\lambda_{\max}$ (nm) | $f$    | CI (main)      |
|---------------|-------|--------|-----------------------|--------|----------------|
| <b>B-Dye1</b> | 1     | 1.8971 | 653.56                | 1.2545 | H→L (0.61)     |
|               | 2     | 2.0894 | 593.38                | 0.0714 | H-2→L (0.54)   |
|               | 3     | 2.5511 | 486.00                | 0.6158 | H-1→L (0.37)   |
|               | 4     | 2.8611 | 433.34                | 2.0994 | H-2→L+1 (0.51) |
|               | 5     | 2.9896 | 414.71                | 1.3374 | H→L+1 (0.54)   |
|               | 6     | 3.0702 | 403.83                | 0.0100 | H-3→L (0.43)   |
|               | 7     | 3.1514 | 393.42                | 0.0447 | H-1→L (0.36)   |
|               | 8     | 3.4028 | 364.36                | 0.0046 | H-1→L+3 (0.31) |
| <b>B-Dye2</b> | 1     | 1.9010 | 652.20                | 1.2430 | H→L (0.60)     |
|               | 2     | 2.0867 | 594.17                | 0.0832 | H-1→L (0.50)   |
|               | 3     | 2.5445 | 487.26                | 0.6048 | H-2→L (0.33)   |
|               | 4     | 2.8724 | 431.64                | 2.0589 | H-1→L+1 (0.48) |
|               | 5     | 2.9977 | 413.60                | 1.3188 | H→L+1 (0.54)   |
|               | 6     | 3.0748 | 403.22                | 0.0374 | H-3→L (0.45)   |
|               | 7     | 3.1454 | 394.18                | 0.0641 | H→L+2 (0.36)   |
|               | 8     | 3.4223 | 362.28                | 0.0083 | H→L+3 (0.30)   |

**Table S7.** The simulated Ti-O distances (Å) between TiO<sub>2</sub> and dye of investigated dye/TiO<sub>2</sub> composites as well as interaction energy (kcal/mol).

| Dye                     | Bond length1 (Å) | Bond length2 (Å) | Energy (kcal/mol) |
|-------------------------|------------------|------------------|-------------------|
| Mjs2@TiO <sub>2</sub>   | 2.07321          | 2.06630          | -12.52            |
| Bjs2@TiO <sub>2</sub>   | 2.07594          | 2.06434          | -12.76            |
| B-Dye1@TiO <sub>2</sub> | 2.08005          | 2.06603          | -12.46            |
| B-Dye2@TiO <sub>2</sub> | 2.08521          | 2.06229          | -15.23            |



### Figure lists

**Figure.S1** The geometry structure of optimized  $(\text{TiO}_2)_9$  cluster. (a) The front view of the optimized structure. (b) The vertical view of the optimized structure. (c) The side view of the optimized structure.

**Figure.S2** The geometric configuration and atom labels of all investigated dye molecules (Mjs2, Bjs2, B-Dye1, B-Dye2).

**Figure.S3** Total density of states (TOTAL DOS) and projected density of states (PDOS) of the investigated dyes.

**Figure.S4** Molecular orbital compositions of individual groups (D,  $\pi$ , A) in HOMO and LUMO of the investigated dyes.

**Figure.S5** The UV-Vis absorption spectra of dye@ $\text{TiO}_2$  at the CAM-B3LYP/6-31G(d) level in THF. For Zn atom only LANL2DZ basis set was used.

**Figure.S6** The frontier molecular orbitals (HOMO-2, HOMO-1, LUMO+1, LUMO+2) diagrams of the dye@ $\text{TiO}_2$  in THF.

**Figure.S7** The optimized geometries of dye@ $\text{TiO}_2$ , and the illustration of electron recombination distance.

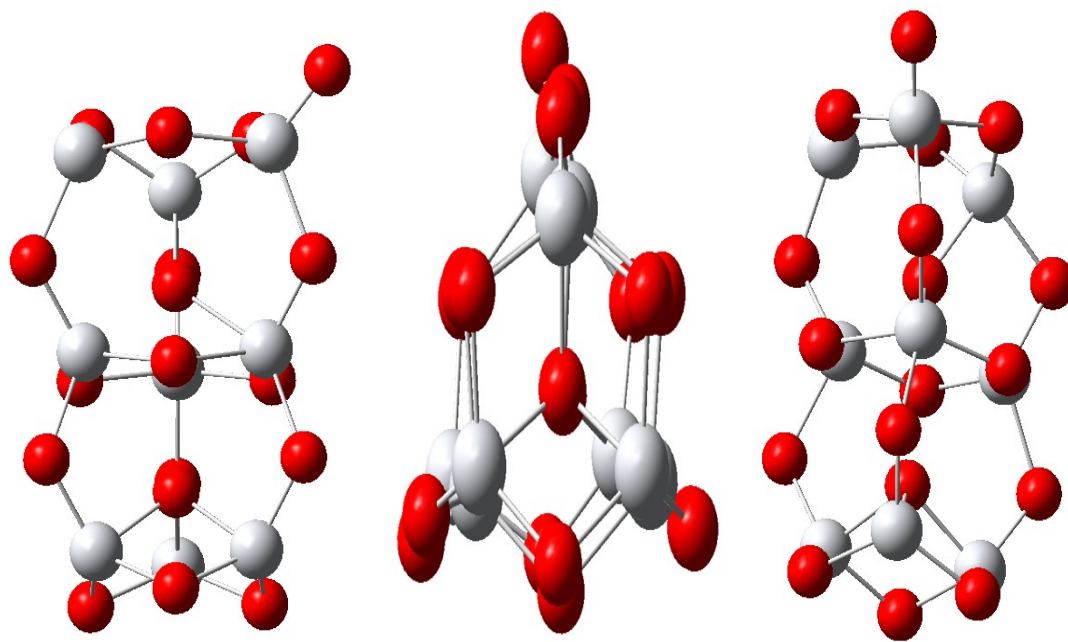

(a) Front view

(b) Vertical view

(c) Side view

**Figure.S1** The geometry structure of optimized  $(\text{TiO}_2)_9$  cluster. (a) The front view of the optimized structure. (b) The vertical view of the optimized structure. (c) The side view of the optimized structure.

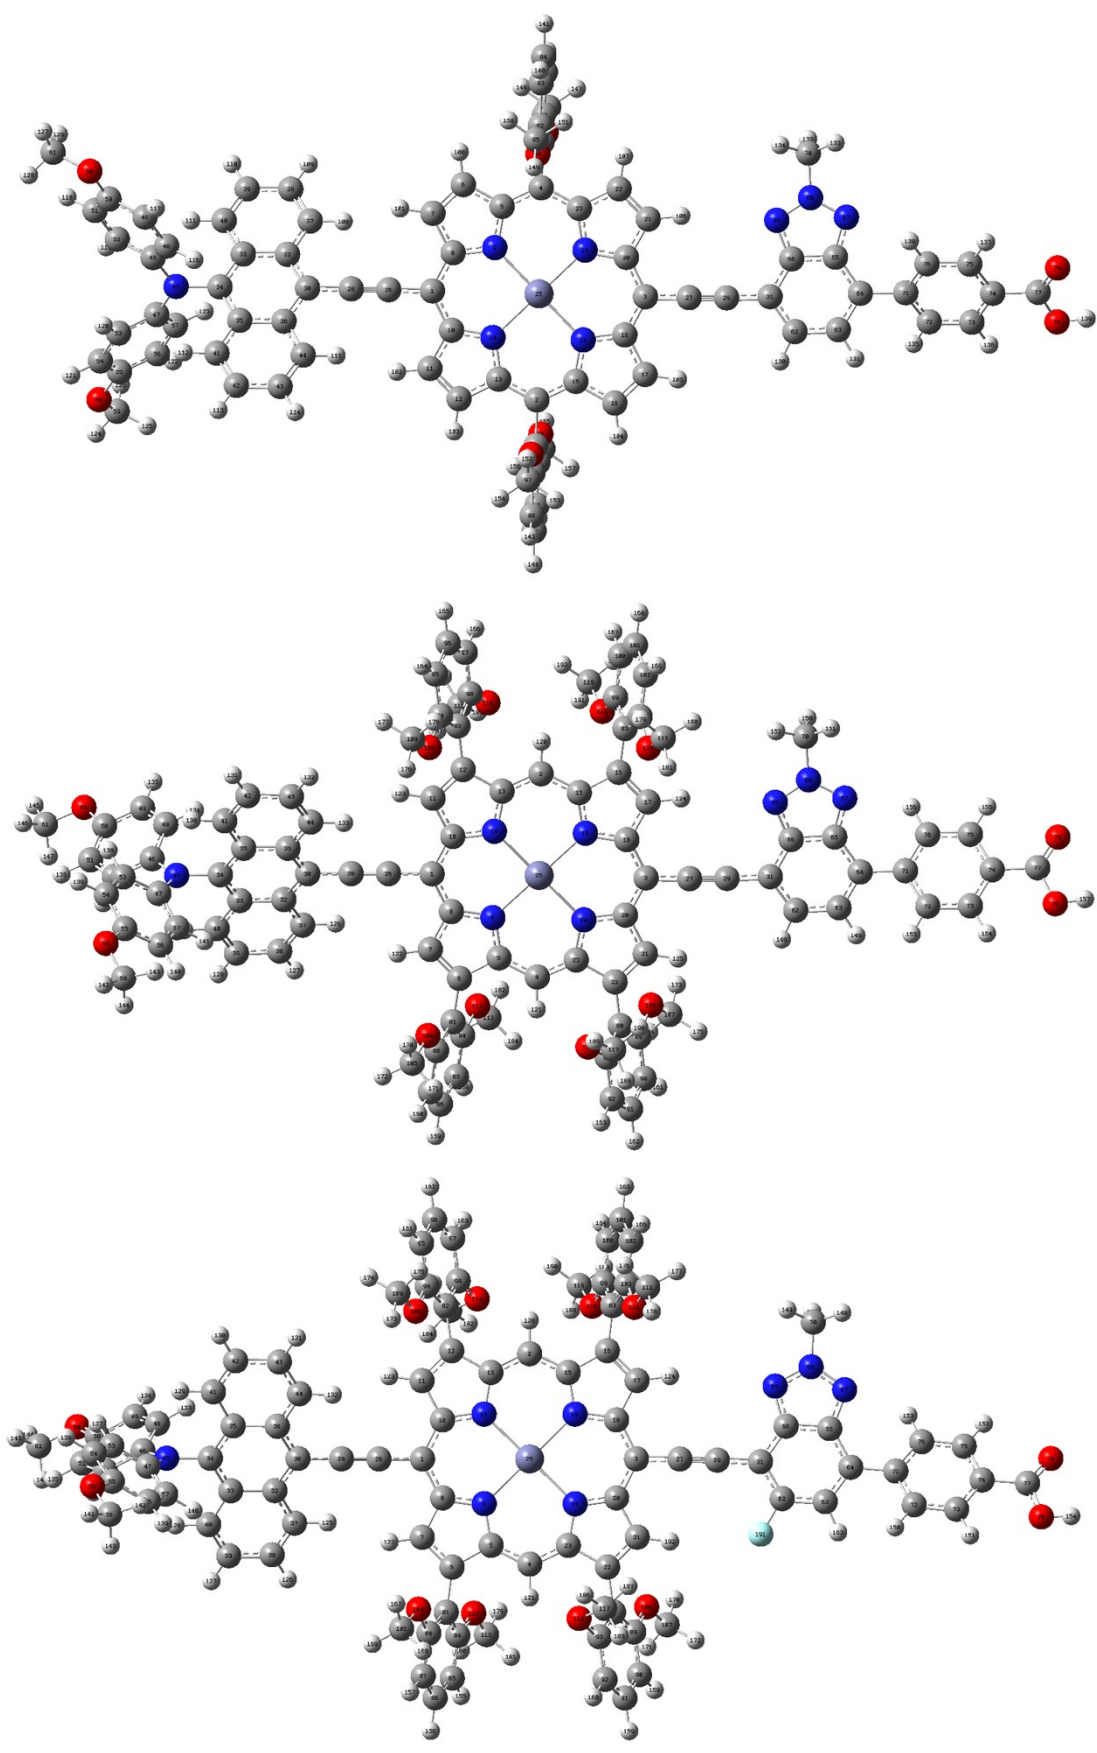

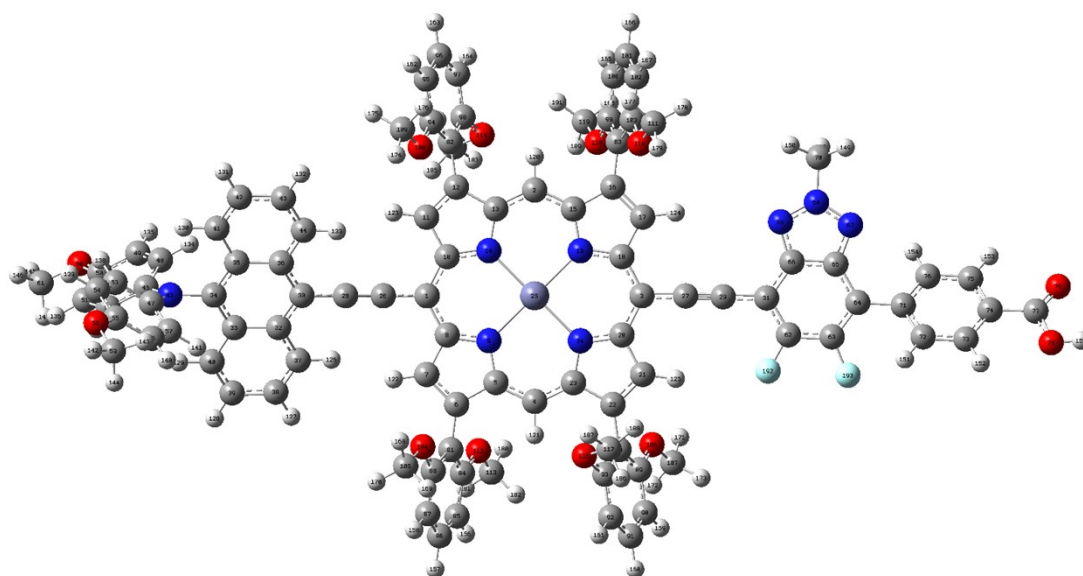

**Figure.S2** The geometric configuration and atom labels of all investigated dye molecules (Mjs2, Bjs2, B-Dye1, B-Dye2).

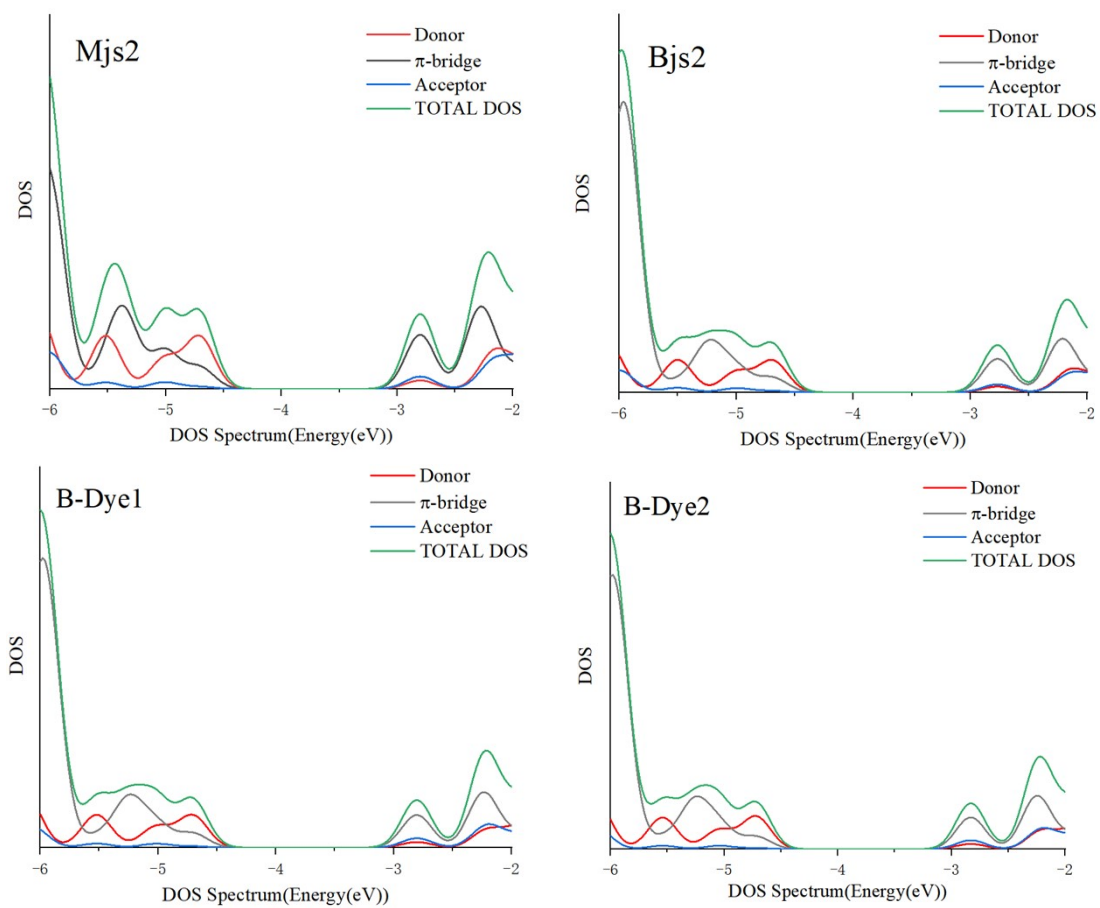

**Figure.S3** Total density of states (TOTAL DOS) and projected density of states (PDOS) of the investigated dyes.

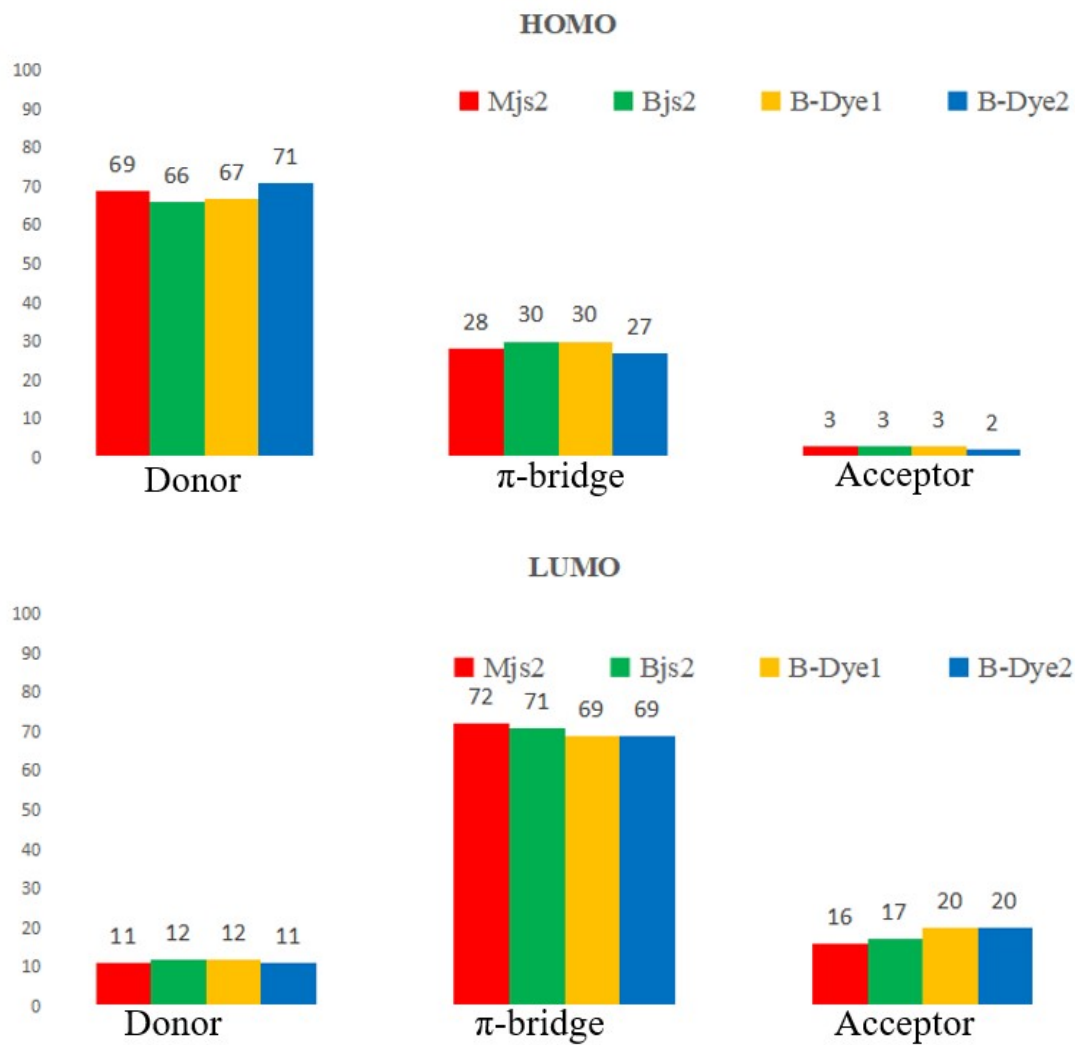

**Figure.S4** Molecular orbital compositions of individual groups (D,  $\pi$ , A) in HOMO and LUMO of the investigated dyes.

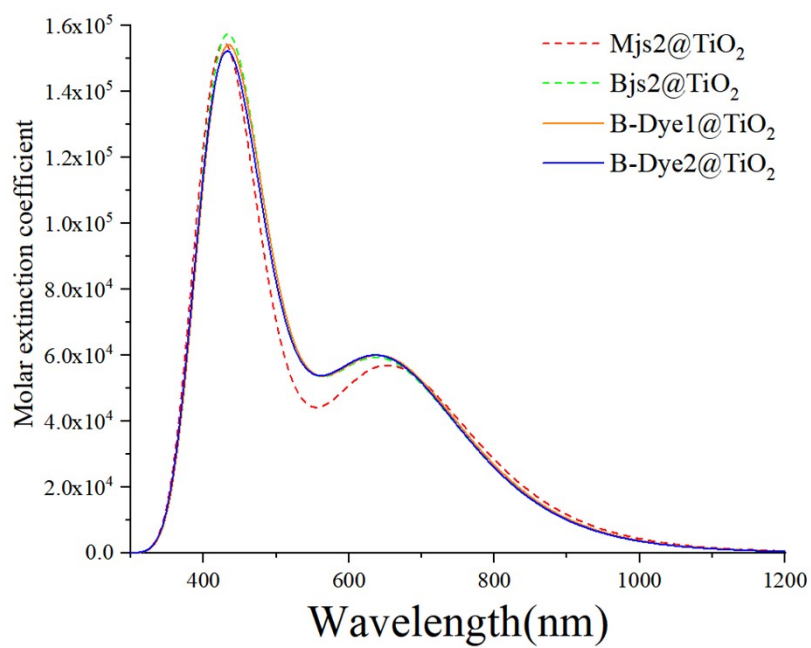

**Figure.S5** The UV-Vis absorption spectra of dye@TiO<sub>2</sub> at the CAM-B3LYP/6-31G(d) level in THF. For Zn atom only LANL2DZ basis set was used.

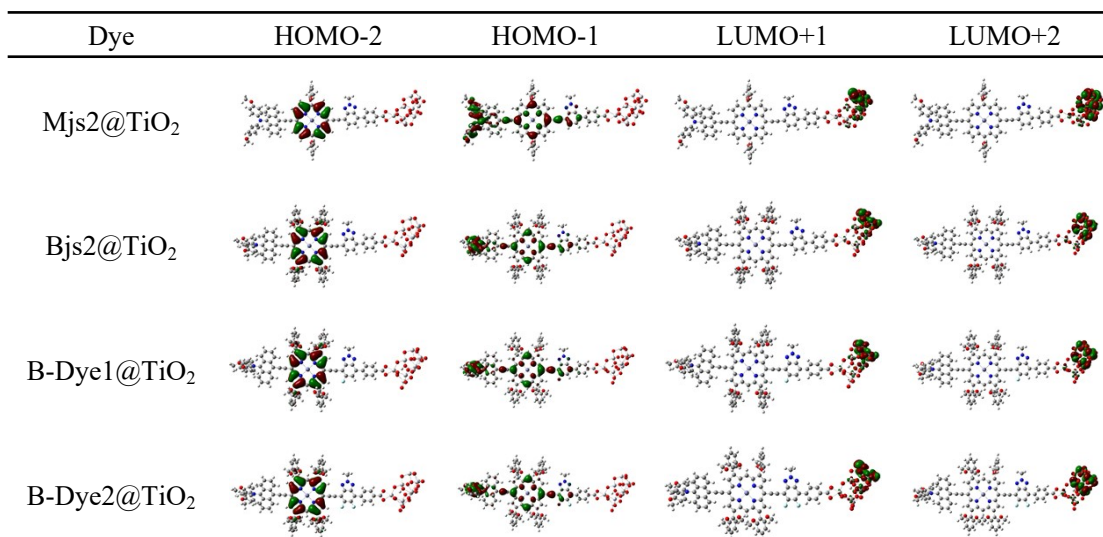

**Figure.S6** The frontier molecular orbitals (HOMO-2, HOMO-1, LUMO+1, LUMO+2) diagrams of the dye@TiO<sub>2</sub> in THF.



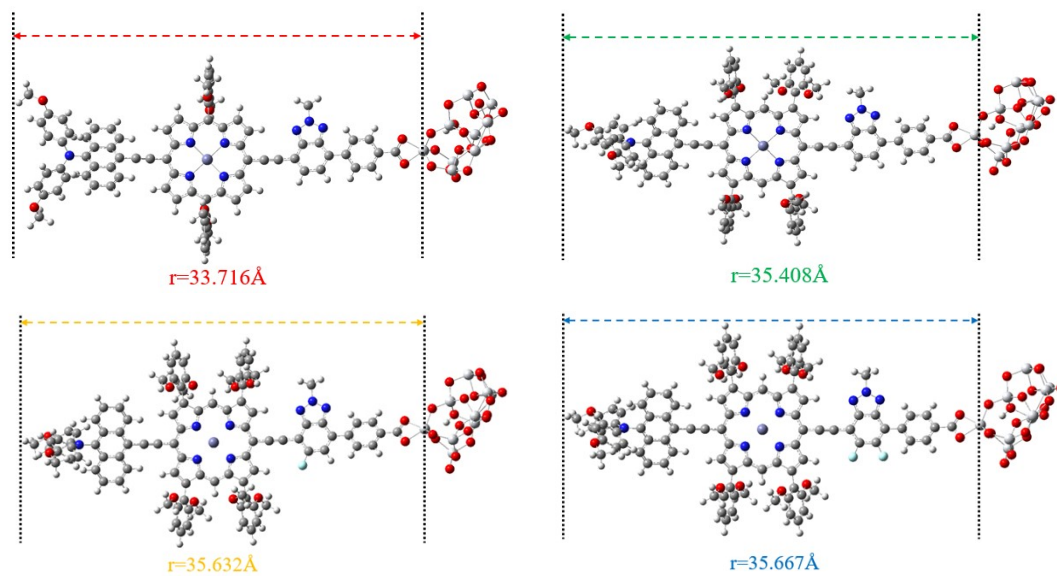

**Figure.S7** The optimized geometries of dye@TiO<sub>2</sub>, and the illustration of electron recombination distance.
